# Supplementary material for: TiO2-modified two-dimensional composite of nitrogen-doped molybdenum trioxide nanosheets as a high-performance anode for lithium-ion batteries
Source: Royal Society of Chemistry journal article supplement (doi:10.1039/d3dt04176j), 2024-01-01
Supplement: d3dt04176j1.pdf [file d3dt04176j1.pdf]

## Electronic Supplementary Information

### TiO<sub>2</sub> modified two-dimensional composite of nitrogen-doped molybdenum trioxide nanosheets as high performance anode for lithium-ion batteries

Zhixin Guo<sup>1,2</sup>, Lixin Zhang<sup>1,2\*</sup>, Hongfang Jiu<sup>1,2\*\*</sup>, Dong Liang<sup>1,2\*\*\*</sup>,

Congli Wang<sup>1,2</sup>, Wei Song<sup>1,2</sup>, Luchao Yue<sup>1,2</sup>, Sicong Che<sup>1,2</sup>, Yuxin Han<sup>1,2</sup>, Jinfeng Ma<sup>1,2</sup>

<sup>1</sup> Shanxi Key Laboratory of High Performance Battery Materials and Devices, North University of China, Taiyuan, 030051, People's Republic of China

<sup>2</sup> School of Chemistry and Chemical Engineering, North University of China, Taiyuan, 030051, People's Republic of China

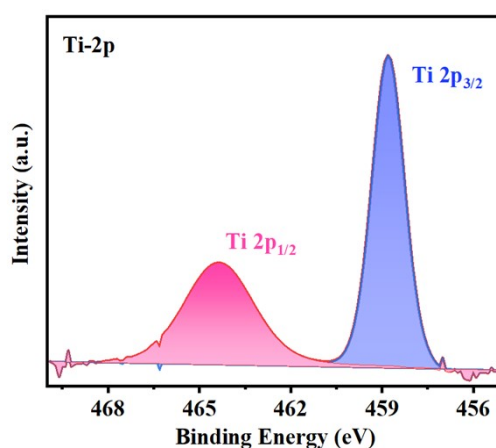

Fig. S1. High-resolution XPS spectra of Ti-2p.

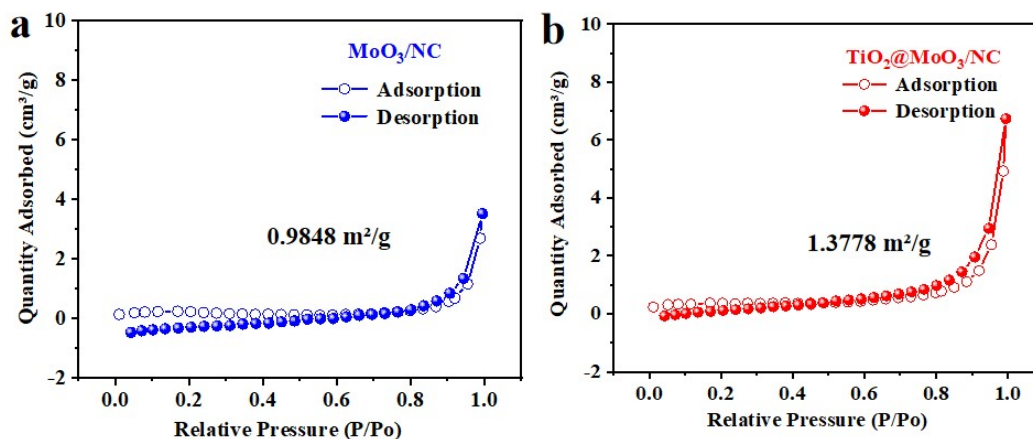

Fig. S2. The BET surface area of MoO<sub>3</sub>/NC and TiO<sub>2</sub>@MoO<sub>3</sub>/NC.

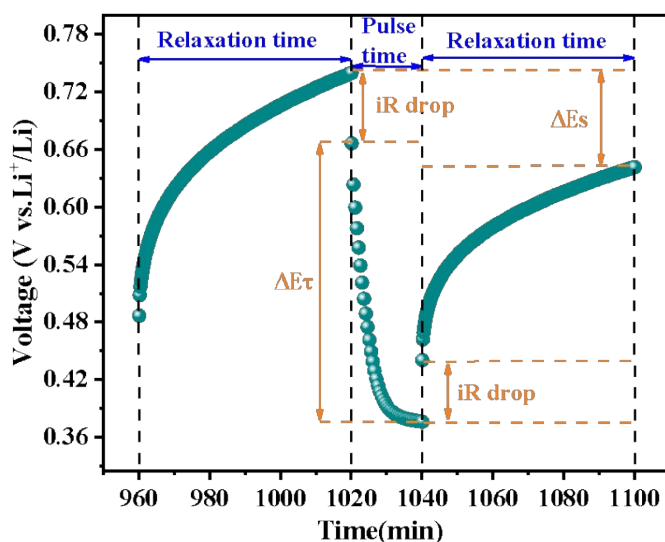

Fig. S3. E vs. t curves of TiO<sub>2</sub>@MoO<sub>3</sub>/NC electrode for a single GITT during discharge process.

The GITT measurement for the initial cycle of TiO<sub>2</sub>@MoO<sub>3</sub>/NC composite was carried out with a current pulse of 0.1 A g<sup>-1</sup> for 20 min and a relaxation time of 20 min in the voltage range of 0.01-3.0 V. The lithiation diffusion coefficient ( $D^{GITT}$ ) can be calculated using the following equation:

$$D^{GITT} = \left(4L^2 / \pi\tau\right) \cdot \left(\Delta E_s / \Delta E\tau\right) \quad (1)$$

Where L (cm) represents the lithium ion diffusion length, which can be equal to the thickness of the electrodes for compact electrode,  $\tau$  is the constant current pulse time (s), and  $\Delta E_s$  (V) presents the difference in the steady state potential of the step at plateau, while  $\Delta E\tau$  (V) is the total change of the voltage during a constant current pulse time.

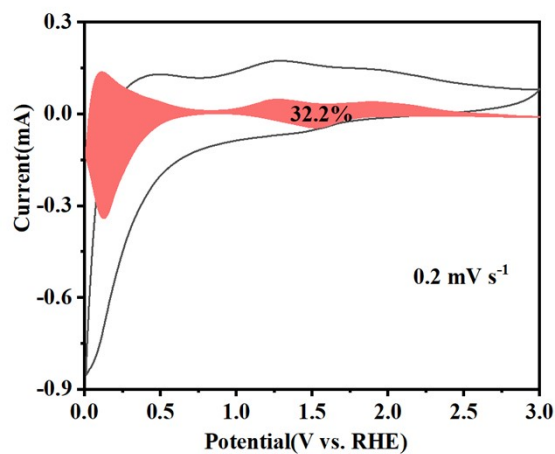

Fig. S4.  $\text{TiO}_2@\text{MoO}_3/\text{NC}$  of the capacitive contribution at  $0.2 \text{ mV s}^{-1}$ .

**Table S1 Comparison of LIBs performance of several reported anode materials**

| Materials                             | Rate performance                      |                                  | Cyclic performance                    |       |                                  | Ref.      |
|---------------------------------------|---------------------------------------|----------------------------------|---------------------------------------|-------|----------------------------------|-----------|
|                                       | Current density ( $\text{A g}^{-1}$ ) | Capacity ( $\text{mAh g}^{-1}$ ) | Current density ( $\text{A g}^{-1}$ ) | cycle | Capacity ( $\text{mAh g}^{-1}$ ) |           |
| $\text{TiO}_2@\text{MoO}_3/\text{NC}$ | 0.05                                  | 419                              | 1                                     | 600   | 517                              | This work |
| $\text{MoO}_3@\text{MoS}_2$           | 0.7                                   | 278                              | 1                                     | 100   | 564                              | [1]       |
| $\alpha\text{-MoO}_3/\text{CNTs}$     |                                       |                                  | 1                                     | 250   | 270                              | [2]       |
| $\text{NiMoO}_4/\alpha\text{-MoO}_3$  |                                       |                                  | 1                                     | 50    | 324                              | [3]       |
| $\text{MoO}_2/\text{carbon}$          |                                       |                                  | 1                                     | 60    | 675                              | [4]       |
| h- $\text{MoO}_3$                     |                                       |                                  | 1                                     | 100   | 619                              | [5]       |

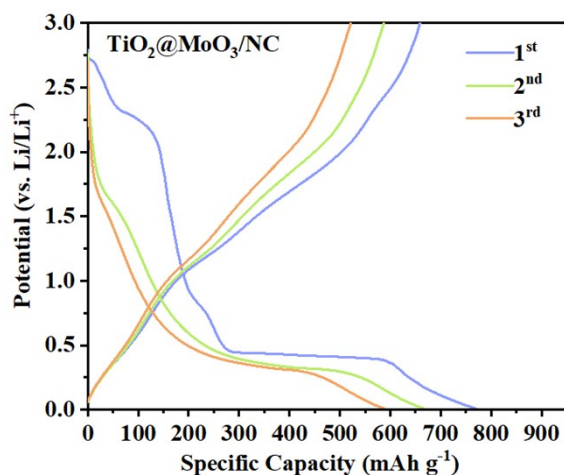

Fig. S5. The galvanostatic charge/ discharge curves of  $\text{TiO}_2@\text{MoO}_3/\text{NC}$ .

**Table S2 Electrical conductivity of  $\text{MoO}_3/\text{NC}$  and  $\text{TiO}_2@\text{MoO}_3/\text{NC}$  samples**

| Materials                             | Electrical conductivity     |
|---------------------------------------|-----------------------------|
| $\text{MoO}_3/\text{NC}$              | $0.05 \mu\text{s cm}^{-1}$  |
| $\text{TiO}_2@\text{MoO}_3/\text{NC}$ | $128.72 \text{ ms cm}^{-1}$ |

(Test instrument model: HIOKI BT3562-01)

## Reference

- [1] M. Faizan, S. Hussain, M. Islam, J.Y. Kim, D. Han, J.H. Bae, D. Vikraman, B. Ali, S. Abbas, H.S. Kim, A.N. Singh, J. Jung, K.W. Nam,  $\text{MoO}_3@\text{MoS}_2$  core-shell structured hybrid anode materials for lithium-ion batteries, *Nanomaterials*, 12 (2022). <https://doi.org/10.3390/nano12122008>.
- [2] D.W. Sheng, M. Zhang, X.Z. Wang, S. Zhou, S.F. Fu, X.X. Liu, Q. Zhang, Carbon nanotubes embedded in alpha- $\text{MoO}_3$  nanoribbons for enhanced lithium-ion storage, *Journal of Materials Science-Materials in Electronics*, 33 (2022) 11743-11752. <https://doi.org/10.1007/s10854-022-08139-3>.
- [3] M.K. Francis, P.B. Bhargav, A. Ramesh, N. Ahmed, C. Balaji, Electrochemical performance analysis of  $\text{NiMoO}_4/\text{alpha-MoO}_3$  composite as anode material for high capacity lithium-ion batteries, *Applied Physics a-Materials Science & Processing*, 128 (2022). <https://doi.org/10.1007/s00339-021-05149-6>.
- [4] D. Wu, F. Ge, S.J. Xing, W.X. Ji, L.M. Peng, Layer structural  $\text{MoO}_2/\text{carbon}$  hybrid composites as anode materials for lithium-ion batteries, *Ionics*, 27 (2021) 4713-4720. <https://doi.org/10.1007/s11581-021-04238-z>.
- [5] Udayabhanu, V. Pavitra, M. Shivanna, F.A. Alharthi, B.M. Praveen, Y.T. Ravikiran, K. Byrappa, G. Nagaraju, High capacitive h- $\text{MoO}_3$  hexagonal rods and its applications towards lithium ion battery, humidity and nitrite sensing, *International Journal of Energy Research*, 45 (2021) 17315-17326. <https://doi.org/10.1002/er.6506>.
